# Supplementary material for: Mitochondrial genomes of the Baltic clam Macoma balthica (Bivalvia: Tellinidae): setting the stage for studying mito-nuclear incompatibilities
Source: PubMed Central journal article supplement (PMC4302422; doi:10.1186/s12862-014-0259-z), 2014-12-21
Supplement: 12862_2014_259_MOESM3_ESM.pdf [file 12862_2014_259_MOESM3_ESM.pdf]

**Additional file 3: Figure S1.** Cloverleaf structures of the 22 *tRNA* genes in the reference mitogenome A10 of *Ma. balthica*. Nomenclature for portions of *tRNA* secondary

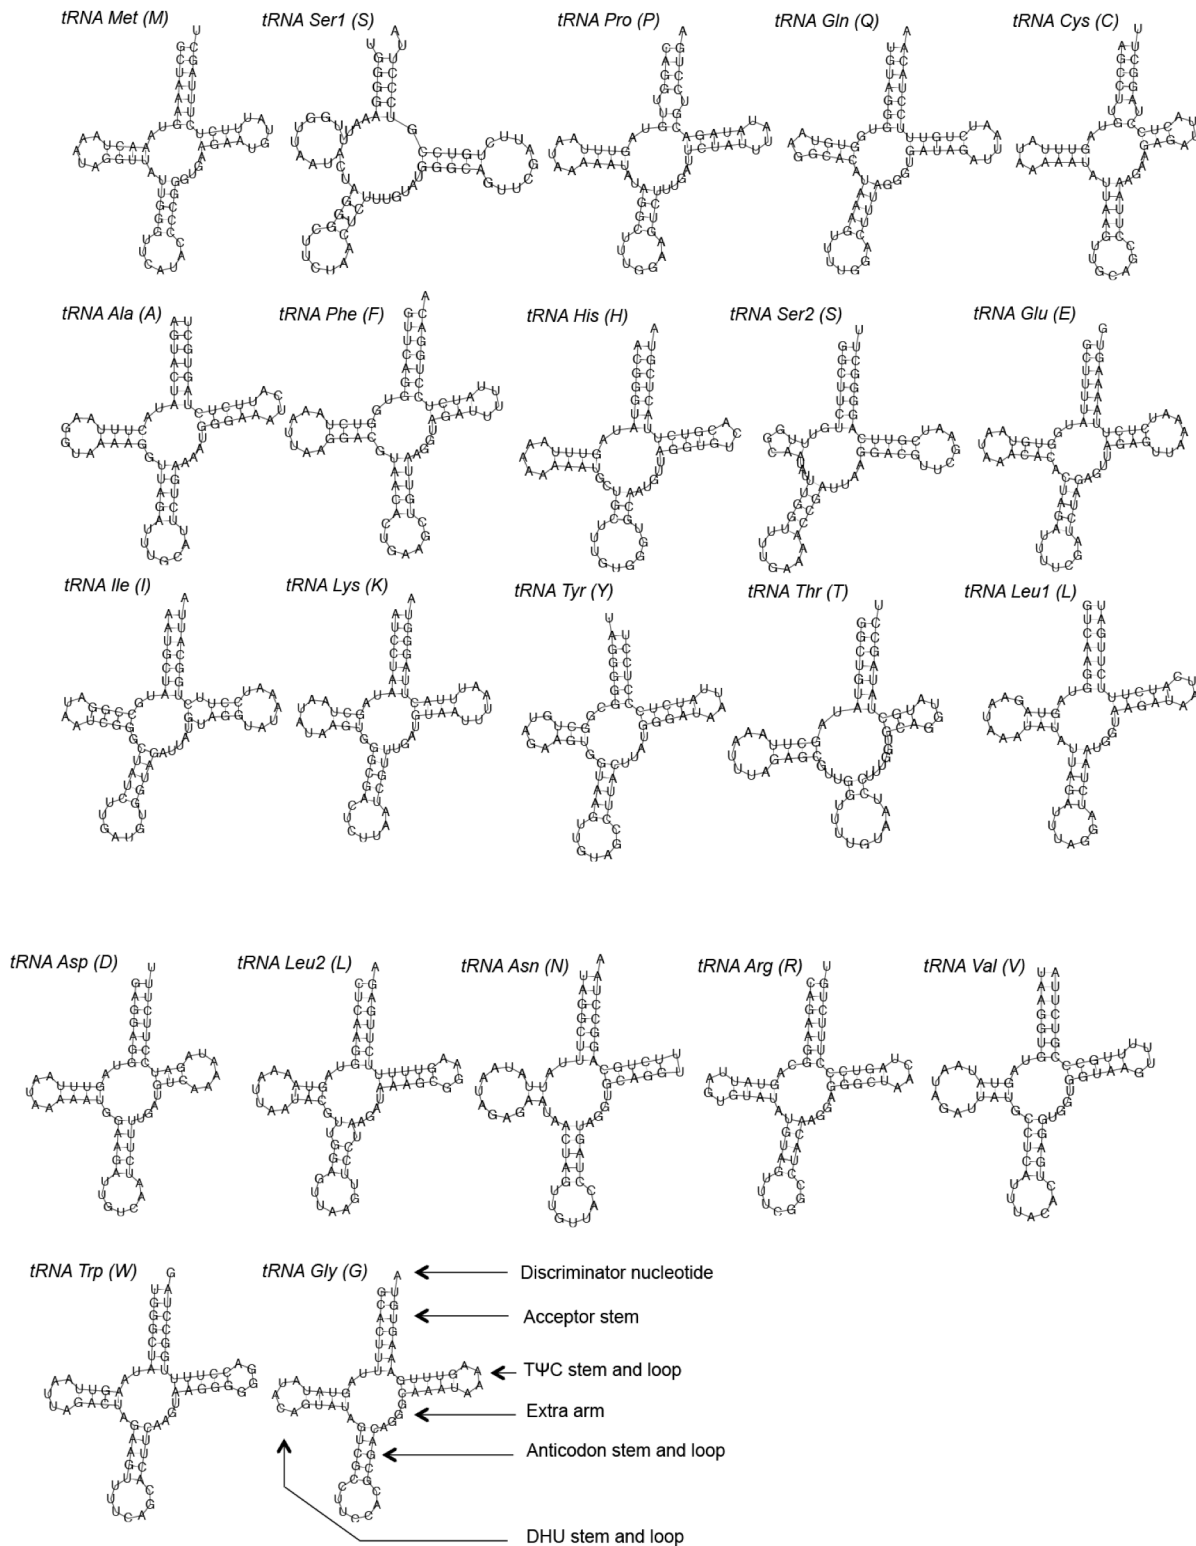

structure is illustrated on *tRNA<sup>Phe</sup>*.
