# Supplementary material for: Mitochondrial genomes of the Baltic clam Macoma balthica (Bivalvia: Tellinidae): setting the stage for studying mito-nuclear incompatibilities
Source: PubMed Central journal article supplement (PMC4302422; doi:10.1186/s12862-014-0259-z), 2014-12-21

**Additional file 4: Figure S2.** Complete alignment of all bivalve *atp8* amino acid sequences available on GenBank (species – accession number of *atp8* (aa length)). Accession numbers of *atp8* sequences are not available for the two species of Tellinidae. For *Ma balthica* and *Mo iridescens* accession number of mitogenomes corresponds [KM373200] and [JN398362], respectively. Amino acid hydrophobicity as described in [38] and references therein. Cytoplasmic side, transmembrane helix and mitochondrial matrix were defined following results for the subclass Heterodonta (transmembrane helix prediction in TMHMM).

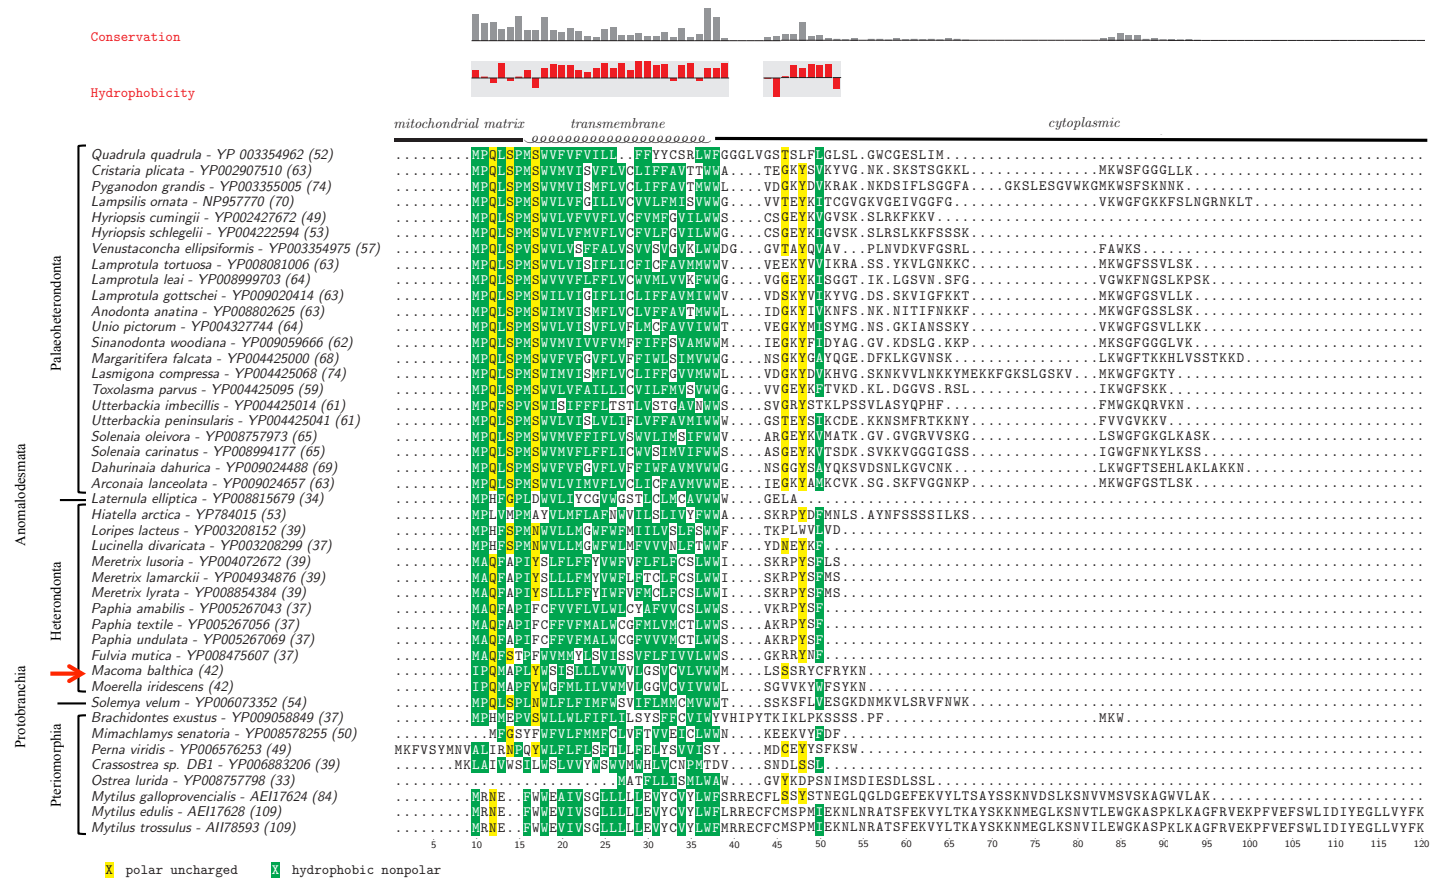

Supplement: 12862_2014_259_MOESM4_ESM.pdf [file 12862_2014_259_MOESM4_ESM.pdf]
