# Supplementary material for: Mitochondrial genomes of the Baltic clam Macoma balthica (Bivalvia: Tellinidae): setting the stage for studying mito-nuclear incompatibilities
Source: PubMed Central journal article supplement (PMC4302422; doi:10.1186/s12862-014-0259-z), 2014-12-21

**Additional file 5: Figure S3.** Statistical parsimony haplotype networks for each PCG of *Ma. balthica*. The number of haplotypes present in each network is given in parentheses.

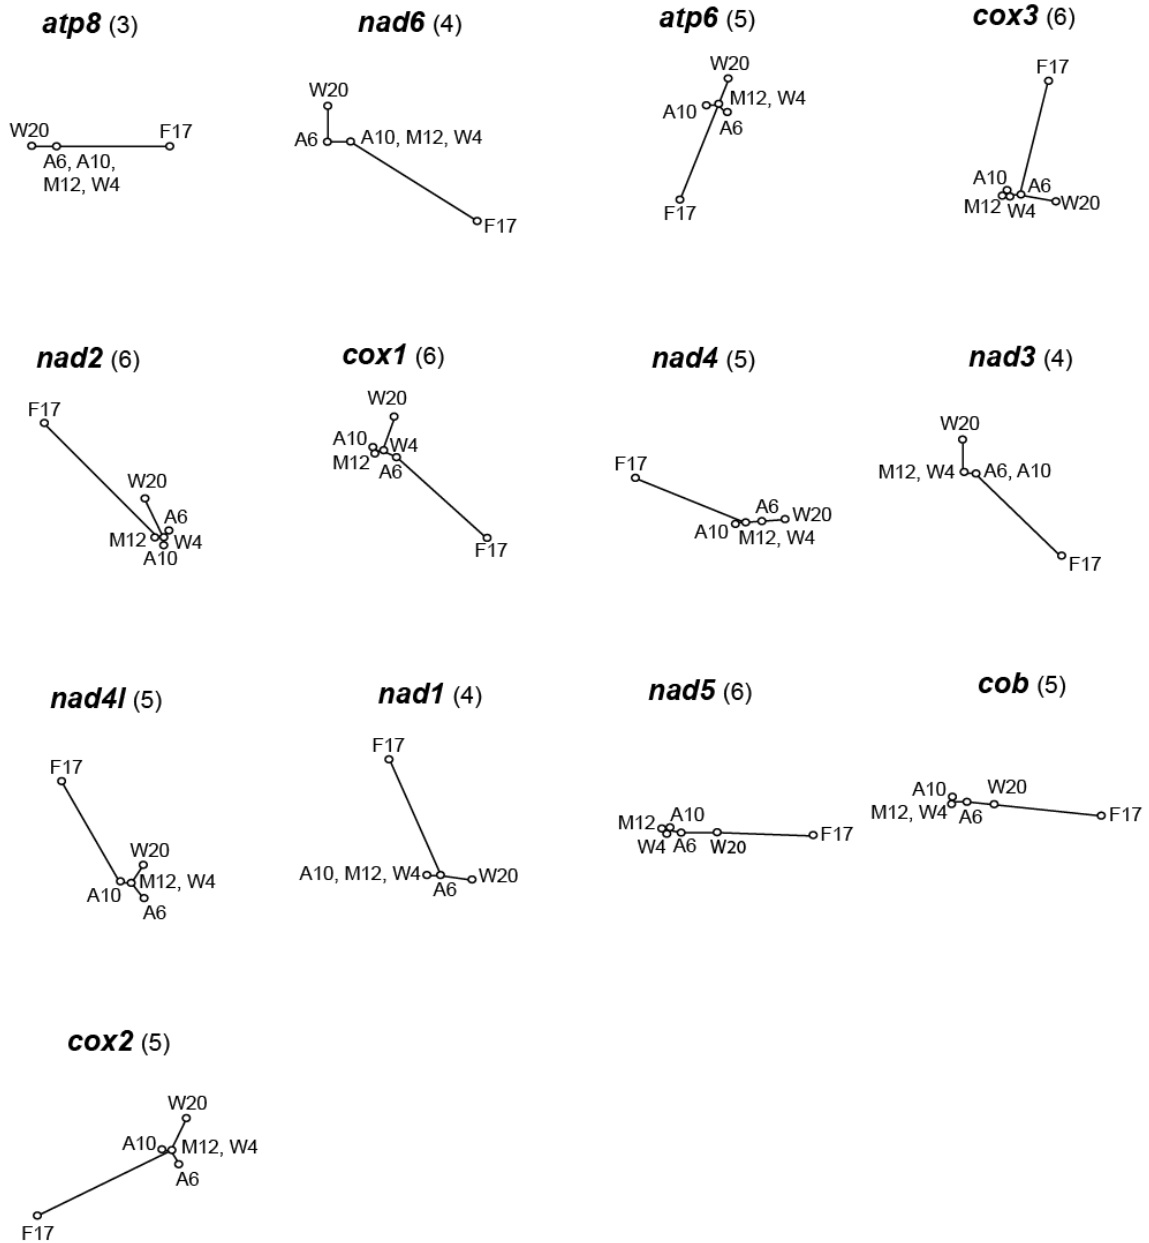

Supplement: 12862_2014_259_MOESM5_ESM.pdf [file 12862_2014_259_MOESM5_ESM.pdf]
