# Supplementary material for: Mitochondrial genomes of the Baltic clam Macoma balthica (Bivalvia: Tellinidae): setting the stage for studying mito-nuclear incompatibilities
Source: PubMed Central journal article supplement (PMC4302422; doi:10.1186/s12862-014-0259-z), 2014-12-21

**Additional file 6: Figure S4.** Mutation mapping for the 13 PCGs of *Ma. balthica*. A10 is taken as the reference and compared to other mitogenomes. Gray circles: synonymous changes in amino-acid (aa) among *M. balthica* lineages (*i.e.* all mitogenomes included); gray diamonds: synonymous changes in aa among *M. balthica rubra* lineages (*i.e.* excluding *M. balthica balthica* (F17)); black circles: non-synonymous changes in aa among *M. balthica* lineages; black diamonds: non-synonymous changes in aa among *M. balthica rubra* lineages.

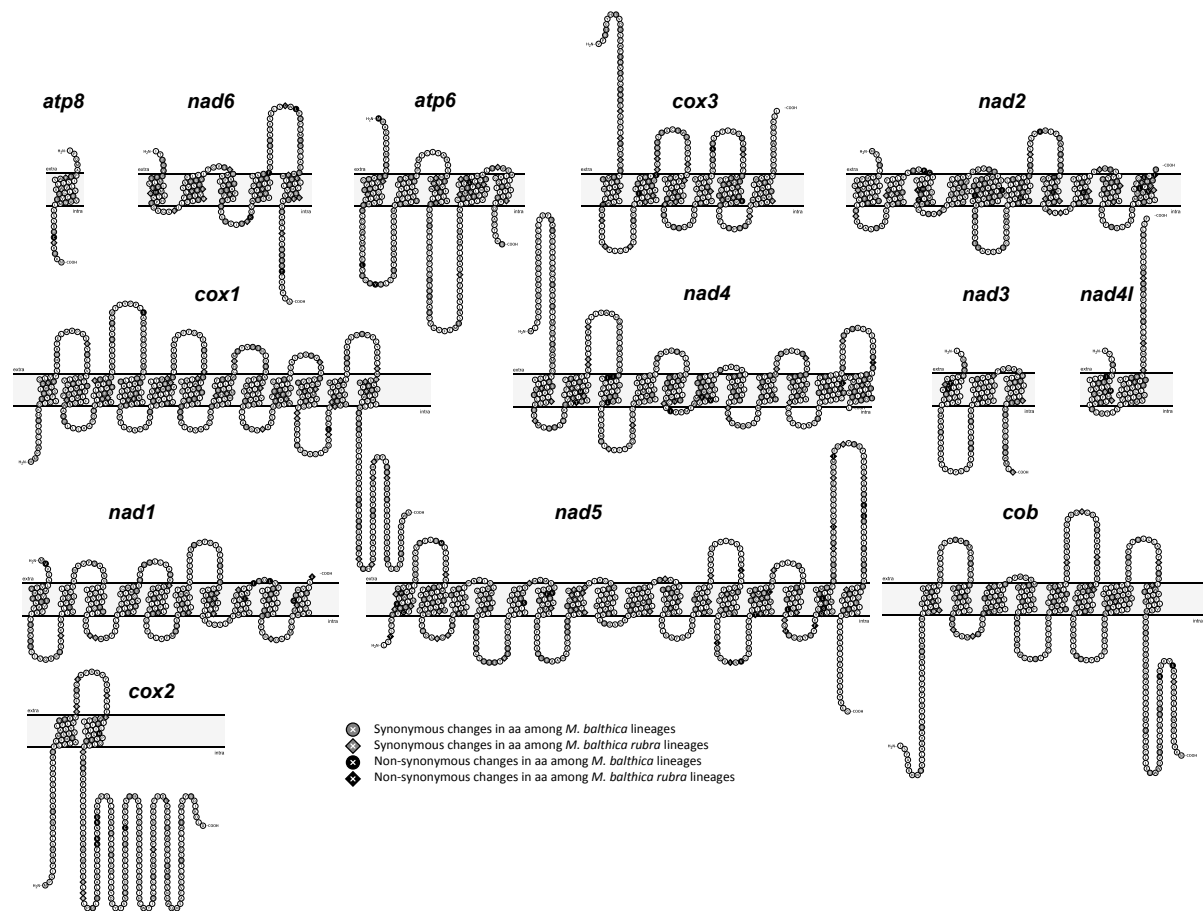

Supplement: 12862_2014_259_MOESM6_ESM.pdf [file 12862_2014_259_MOESM6_ESM.pdf]
